# Supplementary material for: External Validation of the Risk Assessment Model of the International Medical Prevention Registry on Venous Thromboembolism (IMPROVE) for Medical Patients in a Tertiary Health System
Source: PubMed Central journal article supplement — J Am Heart Assoc. 2014 Nov 17;3(6):e001152. doi: 10.1161/JAHA.114.001152 (PMC4338701; doi:10.1161/jaha.114.001152), 2014-11-17

## Supplemental Material

**Table S1:** ICD-9 Codes for the Study Populations Inclusion Criteria

| Inclusion Criteria                                 | iCD-9 Code                                                                                  |
|----------------------------------------------------|---------------------------------------------------------------------------------------------|
| Respiratory/failure or severe lung dz              | 136.3x, 466.xx, 480.xx-487.0x, 490.xx-518.0x, 518.2x-518.84, 519.0x, 519.1x                 |
| Acute infection                                    | 001.xx-136.2x, 136.4x-139.8x, 680.xx-686.xx, 730.xx, 996.6x, 997.62, 998.3x, 998.5x, 999.3x |
| Cancer                                             | 140.xx-208.xx; 230.xx-234.xx                                                                |
| Cardiological causes: IHD, CHF                     | 398.91,402.01, 402.11, 402.91, 404.01, 404.03, 404.11, 404.13, 404.91, 404.93, 428.xx,      |
| Rheumatic disease                                  | 390.xx, 391.xx, 392.xx, 393.xx, 394.xx, 395.xx, 396.xx, 397.xx, 398.0x                      |
| Inflammatory Bowel                                 | 555.xx, 556.xx                                                                              |
| Diabetes mellitus, pancreatitis, and cholecystitis | 250.xx, 577.0x, 577.1x, 575.0x, 575.1x                                                      |

**Table S2: IMPROVE VTE Risk Factors Weights and Definitions**

| Risk Factor                    | Points | Definition                                                                                                                           |
|--------------------------------|--------|--------------------------------------------------------------------------------------------------------------------------------------|
| History of VTE Diagnosis       | 3      | ICD9 – PMH: 453.81, 453.83, 453.84, 453.85, 453.86, 453.87, 453.89, 453.9, 453.40, 453.41, 453.42, 459%                              |
| History of T Thrombophilia     | 2      | ICD9 – PMH: 289.81, 289.82<br>Problem list contains %Thrombophilia%                                                                  |
| Lower Limb Paralysis           | 2      | '%hemiparesis%' OR '%hemiplegia%' OR '%paraplegia%' OR '%quadriplegia%' as documented in motor response nursing assessment flowsheet |
| Prior Diagnosis of Cancer      | 2      | ICD9 – PMH: 140.00- 172.99, 174.00, 208.99                                                                                           |
| History of Immobility > 7 days | 1      | Orders for: 'Activity - Bedrest', 'Activity - Bedrest Strict', 'Activity - Bed in Chair Mode', 'Activity - Out of Bed to Chair'      |
| ICU/CCU Stay                   | 1      | Transfer to ICU/CCU Unit                                                                                                             |
| Over the Age of 60             | 1      | Age > 60                                                                                                                             |

**Table S3:** VTE by risk score

|               |                       | <u>score</u> |       |       |       |       |       |        |
|---------------|-----------------------|--------------|-------|-------|-------|-------|-------|--------|
|               |                       | 0            | 1     | 2     | 3     | 4     | 5-10  | Total  |
| <b>No VTE</b> | n                     | 3917         | 5662  | 3368  | 3598  | 1393  | 1144  | 19082  |
|               | % within score        | 99.87        | 99.53 | 99.32 | 98.87 | 99.15 | 97.69 | --     |
|               | % across scores       | 20.53        | 29.67 | 17.65 | 18.86 | 7.30  | 6.00  | --     |
|               | % of total population | 20.38        | 29.46 | 17.53 | 18.72 | 7.25  | 5.95  | 99.30  |
| <b>VTE</b>    | n                     | 5            | 27    | 23    | 41    | 12    | 27    | 135    |
|               | % within score        | 0.13         | 0.47  | 0.68  | 1.13  | 0.85  | 2.31  | --     |
|               | % across scores       | 3.70         | 20.00 | 17.04 | 30.37 | 8.89  | 20.00 | --     |
|               | % of total population | 0.03         | 0.14  | 0.12  | 0.21  | 0.06  | 0.14  | 0.70   |
| <b>Total</b>  |                       | 3922         | 5689  | 3391  | 3639  | 1405  | 1171  | 19217  |
| <b>%</b>      |                       | 20.41        | 29.60 | 17.65 | 18.94 | 7.31  | 6.09  | 100.00 |

Figure S1: ROC for Derivation Cohort = 0.72

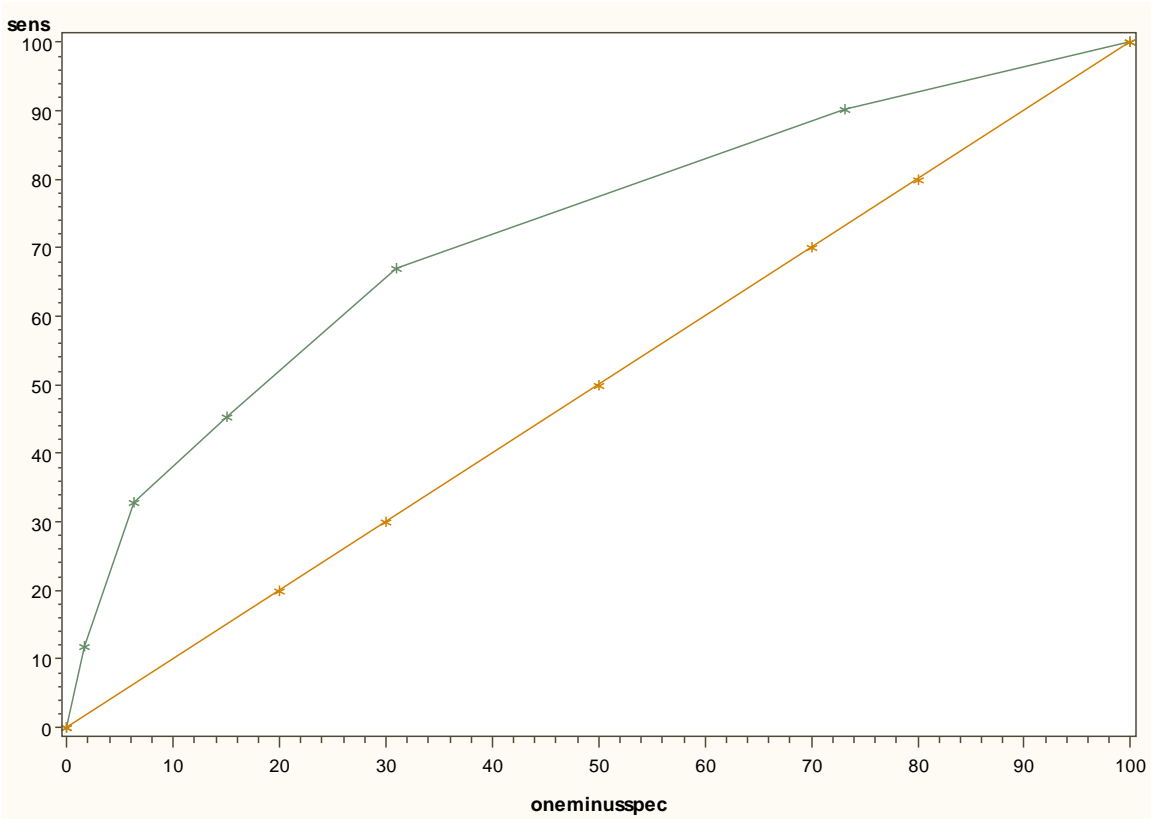

Supplement: jah3-3-e001152-s1.pdf [file jah3-3-e001152-s1.pdf]
